# Supplementary material
Source: MDPI journal article supplement (https://www.mdpi.com/2077-0472/11/7/667)

**Table S1:** Variance components for the six domestication traits in the UMN\_C4 intermediate wheatgrass population.

| Trait            | Variance component |             |              |          |          |          |          |
|------------------|--------------------|-------------|--------------|----------|----------|----------|----------|
|                  | H                  | Genetic (G) | Location (L) | Year (Y) | GxL      | GxY      | Error    |
| Height (cm)      | 0.73               | 1.03E+02    | 1.34E-08     | 0.00E+00 | 1.87E+01 | 1.22E+01 | 9.23E+01 |
| Shattering       | 0.71               | 5.39E-01    | 0.00E+00     | 0.00E+00 | 5.54E-02 | 6.95E-02 | 6.50E-01 |
| Threshability    | 0.79               | 2.60E+00    | 3.24E-03     | 4.81E-03 | 1.51E-01 | 8.07E-01 | 8.15E-01 |
| TKW (g)          | 0.79               | 9.18E-01    | 0.00E+00     | 0.00E+00 | 1.26E-01 | 6.30E-02 | 6.26E-01 |
| Seed Width (mm)  | 0.92               | 7.04E-03    | 0.00E+00     | 0.00E+00 | 8.90E-04 | 3.74E-04 | 3.51E-03 |
| Seed Length (mm) | 0.82               | 1.18E-01    | 0.00E+00     | 0.00E+00 | 5.35E-03 | 5.51E-03 | 2.14E-02 |

**Figure S1:** Squared allele-frequency correlations ( $r^2$ ) plotted against physical distance (mega base pairs, Mbp) in the UMN\_C4 intermediate wheatgrass population. The decline of linkage disequilibrium is shown by plotting the LOWESS curve in blue color.

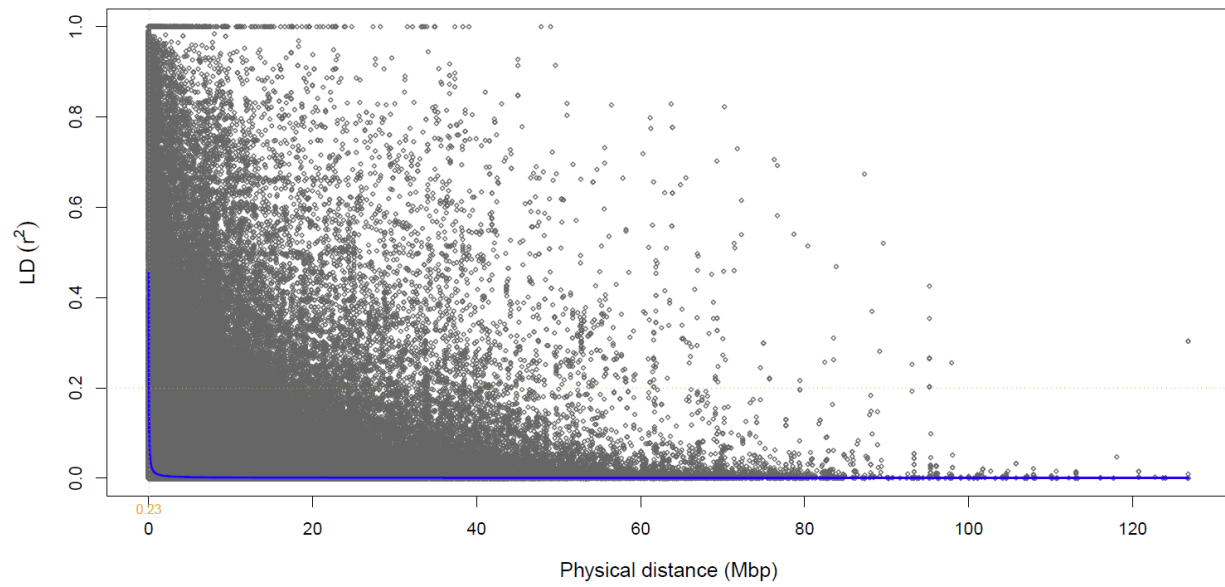

**Figure S2:** QQ-plots generated by FarmCPU model during genome-wide association scan for significant SNP markers. **A:** Height (cm), **B:** Seed length (mm), **C:** Seed width (mm), **D:** Shattering, **E:** Threshability, **F:** Thousand kernel weight (TKW, g)

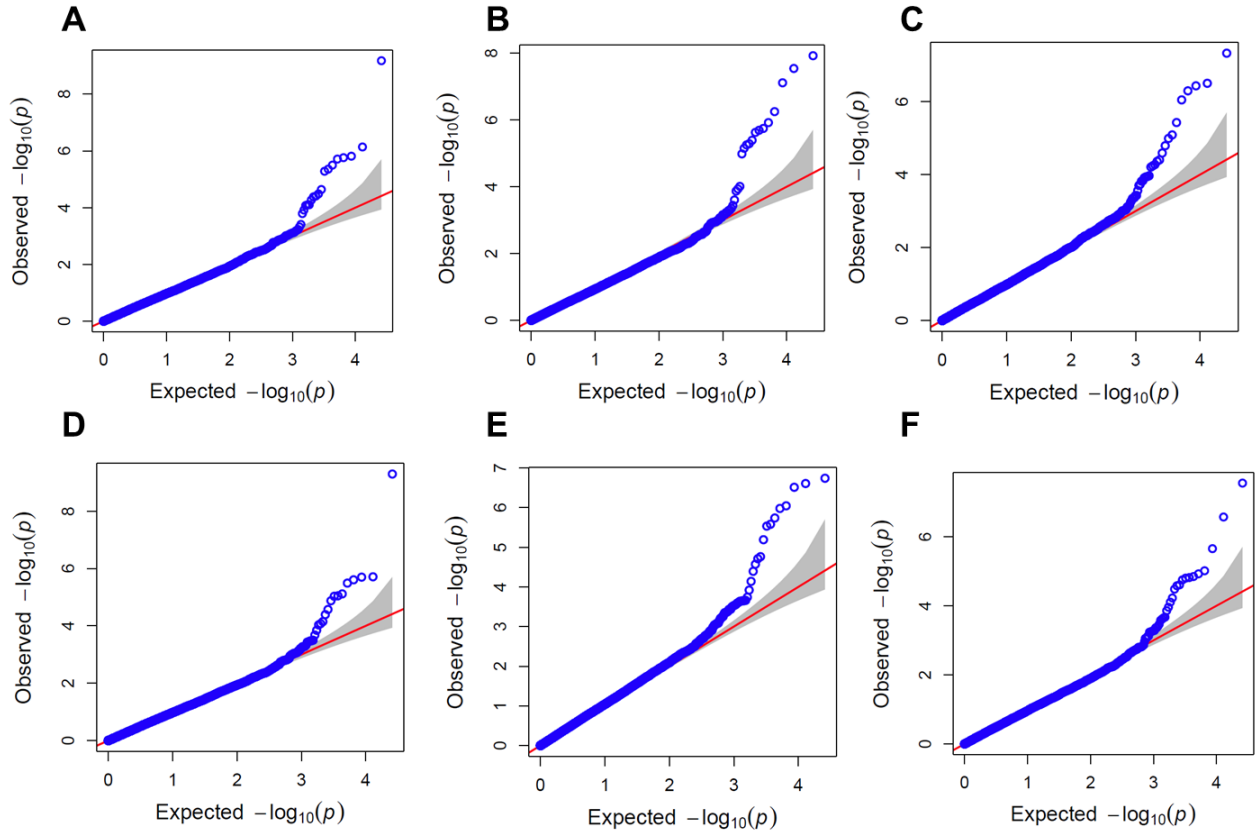

Supplement: s1 [file s1]
